# Supplementary material for: Monocyte-Derived Chicken Macrophages Exposed to Eimeria tenella Sporozoites Display Reduced Susceptibility to Invasion by Toxoplasma gondii Tachyzoite
Source: MDPI journal article supplement (doi:10.3390/microorganisms11081999), 2023-08-03
Supplement: s1 [file s1]

## ***Supplementary Material***

**Supplementary Video 1** Video microscopy of *T. gondii* invasion in a co-infected cell with an *E. tenella* sporozoite at 0-4.5 hpi. *T. gondii* is adherent on the cell which contains a vital *E. tenella* sporozoite. Yellow fluorescence: *E. tenella* sporozoites; green fluorescence: *T. gondii* tachyzoites; wide field: single macrophage.
